# Supplementary material for: Future Proteins: Sustainable Diets for Tenebrio molitor Rearing Composed of Food By-Products
Source: MDPI journal article supplement (doi:10.3390/foods12224092), 2023-11-11
Supplement: s1 [file s1]

## Supplementary Materials

| Comparison of X by group<br>(No adjustment) |                      |                      |                     |                     |                     |                     |
|---------------------------------------------|----------------------|----------------------|---------------------|---------------------|---------------------|---------------------|
| Col Head-<br>Row Head                       | B_Box1               | B_Box2               | CGO_Box1            | CGO_Box2            | CH_Box1             | CH_Box2             |
| B_Box2                                      | -0.814572<br>0.2077  |                      |                     |                     |                     |                     |
| CGO_Box1                                    | -2.404350<br>0.0091* | -1.655810<br>0.0489  |                     |                     |                     |                     |
| CGO_Box2                                    | -1.812826<br>0.0349  | -1.064206<br>0.1436  | 0.550271<br>0.2911  |                     |                     |                     |
| CH_Box1                                     | -3.200166<br>0.0007* | -2.572050<br>0.0051* | -1.122739<br>0.1300 | -1.593958<br>0.0555 |                     |                     |
| CH_Box2                                     | -3.521259<br>0.0002* | -2.893142<br>0.0019* | -1.427566<br>0.0747 | -1.898780<br>0.0288 | -0.270850<br>0.3933 |                     |
| LSWC                                        | -1.170495<br>0.1209  | -0.708049<br>0.2395  | 0.306375<br>0.3797  | -0.048822<br>0.4805 | 1.074161<br>0.1414  | 1.288287<br>0.0988  |
| MRP_Box1                                    | -2.103548<br>0.0177* | -1.544776<br>0.0612  | -0.294130<br>0.3836 | -0.719730<br>0.2358 | 0.446836<br>0.2589  | 0.895386<br>0.1853  |
| MRP_Box2                                    | -1.196544<br>0.1187  | -0.437751<br>0.2418  | 0.573964<br>0.2830  | 0.130365<br>0.4402  | 1.436044<br>0.0785  | 1.684594<br>0.0460  |
| SO_Box1                                     | -1.014148<br>0.1553  | -0.207596<br>0.4178  | 1.480941<br>0.0734  | 0.844350<br>0.1937  | 2.394173<br>0.0003* | 2.715373<br>0.0033* |
| SO_Box2                                     | -1.102047<br>0.1352  | -0.295500<br>0.3838  | 1.370041<br>0.0953  | 0.783450<br>0.2167  | 2.328121<br>0.0100* | 2.647321<br>0.0041* |
| SP                                          | -1.866874<br>0.0310  | -1.096048<br>0.1364  | 0.561994<br>0.2871  | -0.001866<br>0.4993 | 1.420953<br>0.0525  | 1.931251<br>0.0247  |
| WB_Box1                                     | -1.900235<br>0.0468  | -0.941443<br>0.1732  | 0.282437<br>0.3857  | -0.140961<br>0.4440 | 1.171801<br>0.1206  | 1.420350<br>0.0778  |
| WB_Box2                                     | -0.872964<br>0.2833  | -0.014172<br>0.4943  | 1.172155<br>0.1206  | 0.748556<br>0.2271  | 1.978425<br>0.0239* | 2.227174<br>0.0130* |
| WBo                                         | -1.915764<br>0.0277  | -1.416942<br>0.0782  | -0.303225<br>0.3809 | -0.684464<br>0.2468 | 0.558342<br>0.2893  | 0.785902<br>0.2140  |
| WX_Box1                                     | -1.004334<br>0.1576  | -0.255794<br>0.3991  | 1.302379<br>0.0964  | 0.752108<br>0.2260  | 2.238025<br>0.0126* | 2.542857<br>0.0055* |
| WX_Box2                                     | -0.740546<br>0.2295  | 0.007993<br>0.4948   | 1.547771<br>0.0608  | 0.897499<br>0.1593  | 2.448164<br>0.0072* | 2.752988<br>0.0030* |
| Col Head-<br>Row Head                       | LSWC                 | MRP_Box1             | MRP_Box2            | SO_Box1             | SO_Box2             | SP                  |
| MRP_Box1                                    | -0.489048<br>0.3124  |                      |                     |                     |                     |                     |
| MRP_Box2                                    | 0.154209<br>0.4387   | 0.733457<br>0.2316   |                     |                     |                     |                     |
| SO_Box1                                     | 0.887077<br>0.2786   | 1.394402<br>0.0816   | 0.491615<br>0.3115  |                     |                     |                     |
| SO_Box2                                     | 0.834817<br>0.2957   | 1.333784<br>0.0911   | 0.430999<br>0.3332  | -0.087052<br>0.4483 |                     |                     |
| SP                                          | 0.048127<br>0.4808   | 0.728483<br>0.2331   | -0.153955<br>0.4388 | -0.890726<br>0.1845 | -0.807544<br>0.2097 |                     |
| WB_Box1                                     | -0.061166<br>0.4756  | 0.487060<br>0.3128   | -0.245547<br>0.4030 | -0.793887<br>0.2136 | -0.733272<br>0.2317 | -0.141571<br>0.4437 |
| WB_Box2                                     | 0.596449<br>0.2754   | 1.237658<br>0.1079   | 0.504231<br>0.3070  | 0.129050<br>0.4487  | 0.189665<br>0.4248  | 0.760768<br>0.2234  |
| WBo                                         | -0.488811<br>0.3125  | -0.031829<br>0.4873  | -0.710850<br>0.2386 | -1.283745<br>0.0996 | -1.229583<br>0.1094 | -0.691147<br>0.2447 |
| WX_Box1                                     | 0.534304<br>0.2966   | 1.298703<br>0.0970   | 0.428607<br>0.3341  | -0.042599<br>0.4750 | 0.015299<br>0.4927  | 0.772847<br>0.2199  |
| WX_Box2                                     | 0.492705<br>0.2442   | 1.487405<br>0.0484   | 0.617510<br>0.2484  | 0.194988<br>0.4211  | 0.279887<br>0.3890  | 1.023999<br>0.1529  |
| Col Head-<br>Row Head                       | WB_Box1              | WB_Box2              | WBo                 | WX_Box1             |                     |                     |
| WB_Box2                                     | 0.749798<br>0.2247   |                      |                     |                     |                     |                     |
| WBo                                         | -0.483499<br>0.3144  | -1.177478<br>0.1195  |                     |                     |                     |                     |
| WX_Box1                                     | 0.719934<br>0.2355   | -0.169582<br>0.4327  | 1.205540<br>0.1140  |                     |                     |                     |
| WX_Box2                                     | 0.908836<br>0.1817   | 0.018319<br>0.4923   | 1.375552<br>0.0845  | 0.245391<br>0.4031  |                     |                     |

Figure S1. Results ( $p$ -values) of Dunn's test, comparing among different feeding trials.

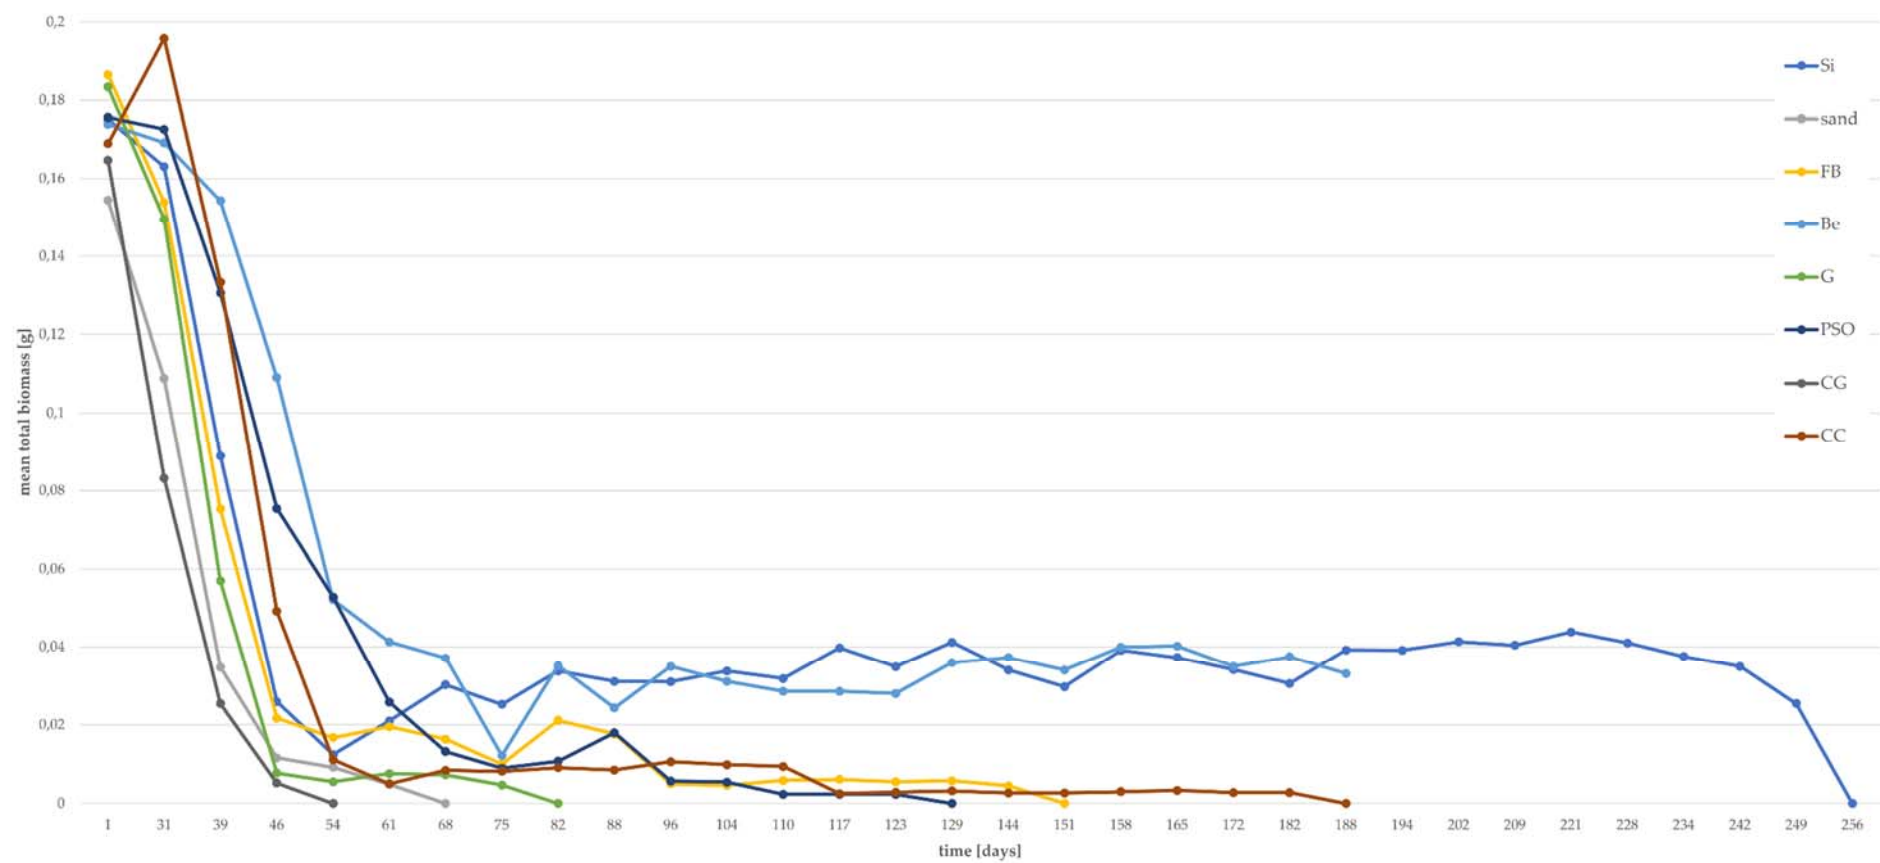

Figure S2. Mean total biomass of “not recommended diets” in gram, determined weekly. (n = 100 for Si, FB, Be, G, PSO, CG, CC; n = 50 for sand).

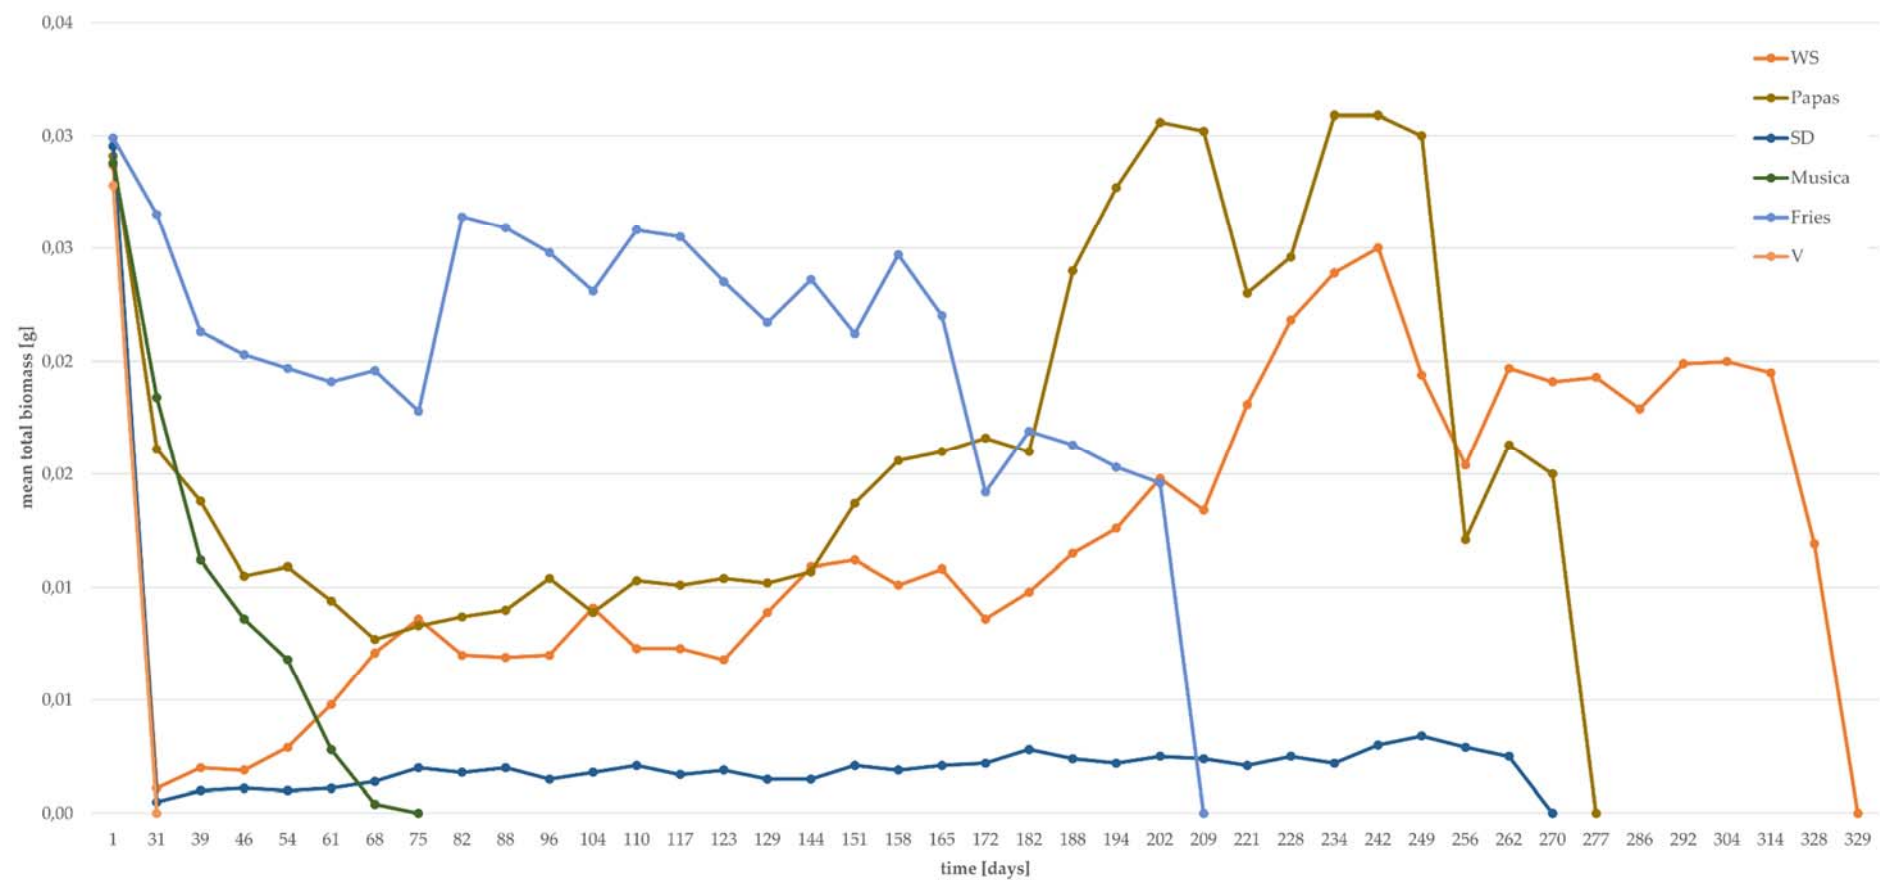

Figure S3. Mean total biomass of “not recommended diets” in gram, determined weekly. (n = 100 for WS, SD; n = 50 for Papas, Fries, V, Musica)

Table S1. Applied single substrate diets for *T. molitor* feeding trials.

|    | Feed                                                               | Abbreviation | Substrate specification                     | Source                                        | Species                                                       | Further processing |
|----|--------------------------------------------------------------------|--------------|---------------------------------------------|-----------------------------------------------|---------------------------------------------------------------|--------------------|
| 1  | wheat bran*                                                        | WB           |                                             | Farina-Mühle, Raaba; Uitz-Mühle, Knittelfeld  | <i>Triticum</i> sp.                                           | -                  |
| 2  | malt residual pellets*                                             | MRP          |                                             | STAMAG Stadlauer Malzfabrik GesmbH; Graz      |                                                               | cut                |
| 3  | corn germ meal, organic*                                           | CGo          |                                             | Lerchenmühle, Wieser GmbH; Golling            | <i>Zea mays</i>                                               | -                  |
| 4  | coffee grounds †                                                   | CG           |                                             | coffee kitchen; FH Joanneum Graz              | <i>Coffea</i> sp.                                             | dried              |
| 5  | coffee chaff †                                                     | CC           |                                             | Albin Sorger "zum Weinrebenbäcker" GmbH, Graz | <i>Coffea</i> sp.                                             | cut                |
| 6  | pumpkin kernel cake †                                              | PSO          |                                             | Haindl Mühle, Kalsdorf bei Graz               | <i>Cucurbita pepo</i> subsp. <i>pepo</i> var. <i>styriaca</i> | -                  |
| 7  | pearl oyster mushroom mycelia with coffee grounds and coffee chaff | AK           |                                             | Pilzkiste GESBR, Graz                         | <i>Pleurotus ostreatus</i>                                    | dried              |
| 8  | <i>Fallopia x bohemica</i> †                                       | FB           | dried rhizome                               | René Rehorska                                 | Hybride of <i>F. japonica</i> and <i>F. sachalinensis</i>     | dried              |
| 9  | Sida †                                                             | Si           | dried whole plant                           | Simon Berner                                  | <i>Sida hermaphrodita</i>                                     | -                  |
| 10 | sweet chestnuts with peel*                                         | CN           | "Bruch"                                     | Stefan Pichler                                | <i>Castanea sativa</i>                                        | -                  |
| 11 | brewer's spent grain                                               | D            |                                             | Brauerei Puntigam, Graz                       |                                                               | frozen, dried      |
| 12 | garlic peel †                                                      | G            |                                             | coffee kitchen; FH Joanneum Graz              | <i>Allium sativum</i>                                         | cut                |
| 13 | bread remains*                                                     | B            | remains of not sold baked goods (not sweet) | Bakeries, Graz                                |                                                               | dried, cut         |
| 14 | runner beans †                                                     | Be           | "Bruchbohnen"                               | René Rehorska                                 | <i>Phaseolus coccineus</i>                                    | cut                |

|    |                         |         |                                              |                                      |                                           |            |
|----|-------------------------|---------|----------------------------------------------|--------------------------------------|-------------------------------------------|------------|
| 15 | Mur sand †              | sand    | sand from the riverbank of the Mur in Mureck | René Rehorska                        |                                           | -          |
| 16 | hempseed cake           | WC      | residue from pressing the oil                | Simon Berner                         | <i>Cannabis sativa</i>                    | cut        |
| 17 | acron flour             | EH      | flour made out of oak fruit nuts             | Nadja Aldrian                        | <i>Quercus</i> spp.                       | -          |
| 18 | sawdust †               | SD      |                                              | Farm near Graz                       | <i>Picea abies</i>                        | -          |
| 19 | Soybeans*               | SO      |                                              | Iglo Austria                         | <i>Glycine max</i>                        | dried, cut |
| 20 | Urtica*                 | U       |                                              | Forest near Graz                     | <i>Urtica dioica</i>                      | dried      |
| 21 | foam peanuts            | V       | packing material                             |                                      |                                           | cut        |
| 22 | pearl oyster mushroom   | A       | remaining fungus stipes after harvesting     | Pilzkiste GESBR, Graz                | <i>Pleurotus ostreatus</i>                | dried      |
| 23 | wheat straw †           | WS      | combine harvester remains                    | Farm near Graz                       | <i>Triticum</i> sp.                       | cut        |
| 24 | sweet potatoes*         | SP      |                                              | Local retailer: Merkur               | <i>Ipomoea batatas</i><br>"Beauregard"    | dried, cut |
| 25 | potatoes                | Maestro |                                              | Local retailer: Spar                 | <i>Solanum tuberosum</i><br>"Maestro"     | dried, cut |
| 26 | potatoes †              | Musica  |                                              | Local retailer: Spar                 | <i>Solanum tuberosum</i><br>"Musica"      | dried, cut |
| 27 | potatoes †              | Fries   |                                              | René Rehorska                        | <i>Solanum tuberosum</i><br>"Friesländer" | dried, cut |
| 28 | jerusalem artichoke †   | Papas   |                                              | Local retailer: Merkur               | <i>Helianthus tuberosus</i> "Papas"       | dried, cut |
| 29 | wheat germs (extracts)* | WK      |                                              | Longevity Labs, Graz; Nico Teuschler |                                           | dried      |

\*Successful substrate, † deadly substrates

Table S2. Nutrient composition of different substrates.

|                                      | WB    | MRP   | PSO   | D     | CG   | CC    | CGo <sup>1</sup> | AK    | Si   | B    | CN    | WC    | Be   | SP    | Papas | WK    | U     | WS   | TM <sup>2</sup> | V    |
|--------------------------------------|-------|-------|-------|-------|------|-------|------------------|-------|------|------|-------|-------|------|-------|-------|-------|-------|------|-----------------|------|
| <b>Dry matter</b>                    | 922   | 901   | 948   | 958   | 916  | 954   | 900              | 914   | 912  | 889  | 918   | 924   | 882  | 881   | 921   | 921   | 923   | 921  | 957             | 886  |
| <b>nutrients</b><br>(g/kg; DM)       |       |       |       |       |      |       |                  |       |      |      |       |       |      |       |       |       |       |      |                 |      |
| crude protein                        | 194   | 191   | 645   | 294   | 148  | 176   | 148              | 176   | 18   | 163  | 80    | 353   | 257  | 90    | 153   | 382   | 209   | 55   | 597             | 9    |
| Crude fat                            | 59    | 30    | 147   | 133   | 166  | 37    | 111              | 21    | 5    | 36   | 31    | 79    | 25   | 10    | 8     | 103   | 25    | 12   | 273             | nn   |
| crude fiber                          | 117   | 110   | 34    | 178   | 259  | 350   | 70               | 151   | 605  | 8    | 40    | 323   | 50   | 53    | 43    | -     | 8     | -    | -               | -    |
| Crude ash                            | 62    | 52    | 90    | 47    | 16   | 72    | 30               | 178   | 33   | 29   | 25    | 75    | 46   | 65    | 68    | -     | -     | -    | -               | -    |
| Starch                               | 178   | 294   | 27    | 39    | 32   | 67    | 429              | 25    | 29   | 604  | 394   | 11    | 404  | 391   | nn    | 236   | -     | nn   | nn              | 533  |
| Sugar                                | 64    | 80    | 38    | 13    | 5    | 8     | 42               | 10    | 8    | 63   | 194   | 28    | 80   | 258   | 647   | 115   | 59    | 68   | 15              | 10   |
| Calcium                              | 1.5   | 1.9   | 1.2   | 5.1   | 2.3  | 11.1  | 0.4              | 57.8  | 9.4  | 0.8  | 1.0   | 2.6   | 1.1  | 5.4   | 1.3   | 0.8   | 68.4  | 2.7  | 0.8             | 0.5  |
| Phosphor                             | 13.9  | 4.9   | 20.3  | 8.0   | 1.5  | 0.9   | 6.8              | 1.4   | 0.5  | 2.4  | 1.7   | 16.2  | 5.7  | 2.7   | 4.7   | 10.5  | 4.7   | 2.1  | 10.9            | 0.2  |
| Magnesium                            | 5.7   | 1.6   | 8.8   | 2.6   | 1.7  | 3.8   | 2.5              | 2.2   | 0.7  | 0.7  | 1.1   | 6.9   | 2.3  | 1.1   | 1.0   | 1.8   | 7.4   | 1.0  | 5.1             | 0.7  |
| Kalium                               | 14.1  | 10.7  | 15.8  | 0.4   | 3.9  | 18.6  | 10.2             | 8.8   | 4.4  | 3.4  | 10.9  | 11.9  | 19.3 | 27.6  | 30.2  | 7.6   | 28.2  | 18.5 | 10.4            | 0.6  |
| Natrium                              | 0.14  | 0.28  | 5.71  | 0.21  | 0.14 | 0.22  | 0.09             | 0.75  | 0.29 | 8.80 | 0.23  | 0.23  | 0.25 | 0.22  | 0.20  | 0.28  | 0.21  | 0.24 | 1.25            | 0.88 |
| <b>micronutrients</b><br>(mg/kg; DM) |       |       |       |       |      |       |                  |       |      |      |       |       |      |       |       |       |       |      |                 |      |
| Iron                                 | 151.8 | 189.8 | 167.7 | 200.4 | 49.1 | 307.1 | -                | 347.9 | 51.5 | 23.6 | 22.9  | 241.3 | 69.2 | 132.8 | 67.7  | 110.7 | 159.3 | 99.9 | 63.7            | 20.3 |
| Manganese                            | 144.3 | 35.5  | 72.8  | 60.5  | 31.7 | 51.4  | -                | 85.3  | 29.6 | 16.9 | 148.1 | 153.7 | 20.4 | 10.2  | 6.3   | 175.9 | 78.0  | 21.7 | 16.7            | 0.8  |
| Zinc                                 | 108.5 | 52.5  | 140.3 | 124.2 | 14.2 | 19.9  | -                | 28.4  | 7.7  | 16.9 | 19.6  | 108.2 | 35.1 | 11.2  | 11.5  | 142.2 | 19.5  | 18.5 | 141.1           | 3.4  |
| Copper                               | 14.1  | 7.8   | 23.2  | 18.8  | 20.7 | 69.2  | -                | 31.7  | 3.3  | 3.4  | 9.8   | 27.1  | 7.9  | 4.1   | 4.2   | 8.7   | 7.6   | 3.3  | 24.0            | 0.6  |

DM = dry matter; nn = successfully analyzed, value below detection limit; <sup>1</sup> analyzed by BOKU; <sup>2</sup> *Tenebrio molitor* larvae, fed with wheat bran. Blue color: successful substrates.
